# Supplementary material for: Two Polarity-Sensitive Fluorescent Probes Based on Curcumin Analogs for Visualizing Polarity Changes in Lipid Droplets
Source: MDPI journal article supplement (doi:10.3390/molecules28186626), 2023-09-14
Supplement: s1 [file s1]

## *Electronic Supplementary Information (ESI) for*

# **Two polarity-sensitive fluorescent probes based on curcumin analogs for visualizing polarity changes in lipid droplets**

Lin Shan, Xue-Wei Li, Xiu-Li Zheng, Jia-Sheng Wu, Hao-Hui Ren, Wei-Min Liu\*, and Peng-Fei Wang

## **Table of Contents**

| Section    | Title                                                                                                                  | Pages |
|------------|------------------------------------------------------------------------------------------------------------------------|-------|
| Table S1   | Photophysical properties of CC-CH in different polarity solvents                                                       | S2    |
| Table S2   | Photophysical properties of CC-Cl in different polarity solvents                                                       | S2    |
| Figure S1  | Fluorescence changes of CC-CH and CC-Cl in H <sub>2</sub> O/1,4-dioxane mixtures with different 1,4-dioxane fractions. | S3    |
| Figure S2  | Cytotoxicity testing                                                                                                   | S3    |
| Figure S3  | pH stability testing                                                                                                   | S4    |
| Figure S4  | Anti-interference testing                                                                                              | S4    |
| Figure S5  | Photostability testing in HepG-2 cells.                                                                                | S5    |
| Figure S6  | CLSM images of CC-CH and CC-Cl in HepG-2 cells at different incubation times.                                          | S5    |
| Figure S7  | Colocalization images of CC-CH with LTG and MTG in HepG-2 cells.                                                       | S6    |
| Figure S8  | Colocalization images of CC-Cl with LTG and MTG in HepG-2 cells.                                                       | S6    |
| Figure S9  | Anti-light interference testing of CC-CH and BODIPY 493/503                                                            | S7    |
| Figure S10 | Anti-light interference testing of CC-Cl and BODIPY 493/503                                                            | S7    |
| Figure S11 | Colocalization images of CC-CH with BODIPY 493/503 in different cell lines.                                            | S8    |

|                |                                                                              |        |
|----------------|------------------------------------------------------------------------------|--------|
| Figure S12     | Colocalization images of CC-Cl with BODIPY 493/503 in different cell lines.  | S8     |
| Figure S13     | Visualization of M- $\beta$ -CD-induced LD polarity increase in HepG-2 cells | S9     |
| Scheme S1      | Synthetic route to CC-CH and CC-Cl                                           | S9     |
| Methods        | Synthesis details of the intermediates                                       | S10    |
| Figures S14-18 | NMR and MS spectra                                                           | S11-13 |
| References     |                                                                              | S13    |

**Table S1.** Photophysical properties of CC-CH in different polarity solvents.

| <b>solvent</b> | <b>E<sub>T</sub>(30)<sup>a</sup><br/>(kcalmol<sup>-1</sup>)</b> | <b><math>\lambda_{\text{abs}}</math><br/>(nm)</b> | <b><math>\lambda_{\text{F}}</math><br/>(nm)</b> | <b>stokes shift<br/>(cm<sup>-1</sup>)</b> | <b><math>\epsilon</math><br/>(M<sup>-1</sup>cm<sup>-1</sup>)</b> | <b><math>\Phi_{\text{F}}</math><sup>b</sup><br/>(%)</b> |
|----------------|-----------------------------------------------------------------|---------------------------------------------------|-------------------------------------------------|-------------------------------------------|------------------------------------------------------------------|---------------------------------------------------------|
| <b>Toluene</b> | 33.9                                                            | 498                                               | 563                                             | 2318                                      | 99300                                                            | 12.2                                                    |
| <b>THF</b>     | 37.4                                                            | 504                                               | 582                                             | 2659                                      | 85300                                                            | 12.5                                                    |
| <b>EA</b>      | 38.1                                                            | 499                                               | 578                                             | 2739                                      | 75400                                                            | 11.7                                                    |
| <b>DCM</b>     | 40.7                                                            | 508                                               | 596                                             | 2907                                      | 94600                                                            | 13.5                                                    |
| <b>DMSO</b>    | 45.1                                                            | 532                                               | 626                                             | 2823                                      | 72000                                                            | 3.3                                                     |

<sup>a</sup>E<sub>T</sub>(30) is the solvent polarity parameter[1].

<sup>b</sup> $\Phi_{\text{F}}$  is the absolute fluorescence quantum yield with an integrating sphere.

**Table S2.** Photophysical properties of CC-Cl in different polarity solvents.

| <b>solvent</b> | <b>E<sub>T</sub>(30)<sup>a</sup><br/>(kcalmol<sup>-1</sup>)</b> | <b><math>\lambda_{\text{abs}}</math><br/>(nm)</b> | <b><math>\lambda_{\text{F}}</math><br/>(nm)</b> | <b>stokes shift<br/>(cm<sup>-1</sup>)</b> | <b><math>\epsilon</math><br/>(M<sup>-1</sup>cm<sup>-1</sup>)</b> | <b><math>\Phi_{\text{F}}</math><sup>b</sup><br/>(%)</b> |
|----------------|-----------------------------------------------------------------|---------------------------------------------------|-------------------------------------------------|-------------------------------------------|------------------------------------------------------------------|---------------------------------------------------------|
| <b>Toluen</b>  | 33.9                                                            | 522,551                                           | 591                                             | 2237                                      | 17400                                                            | 39.8                                                    |
| <b>THF</b>     | 37.4                                                            | 555                                               | 608                                             | 1571                                      | 11900                                                            | 36.5                                                    |
| <b>EA</b>      | 38.1                                                            | 546                                               | 598                                             | 1593                                      | 9400                                                             | 38.8                                                    |
| <b>DCM</b>     | 40.7                                                            | 553                                               | 623                                             | 2032                                      | 14400                                                            | 42.9                                                    |
| <b>DMSO</b>    | 45.1                                                            | 578                                               | 648                                             | 1869                                      | 18900                                                            | 4.4                                                     |

<sup>a</sup>E<sub>T</sub>(30) is the solvent polarity parameter[1].

<sup>b</sup> $\Phi_{\text{F}}$  is the absolute fluorescence quantum yield with an integrating sphere.

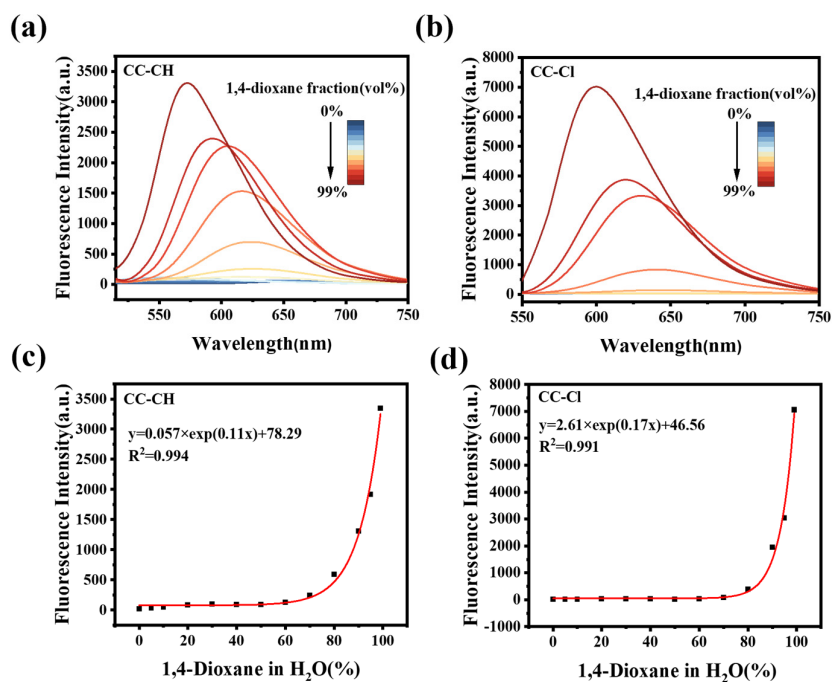

**Figure S1.** Fluorescence spectra of (a) CC-CH and (b) CC-Cl in H<sub>2</sub>O/1,4-dioxane mixtures with different 1,4-dioxane fractions. Plots of fluorescence intensity of (c) CC-CH and (d) CC-Cl in H<sub>2</sub>O/1,4-dioxane mixtures *vs* different 1,4-dioxane fractions. CC-CH:  $\lambda_{\text{ex}} = 492$  nm, CC-Cl:  $\lambda_{\text{ex}} = 522$  nm.

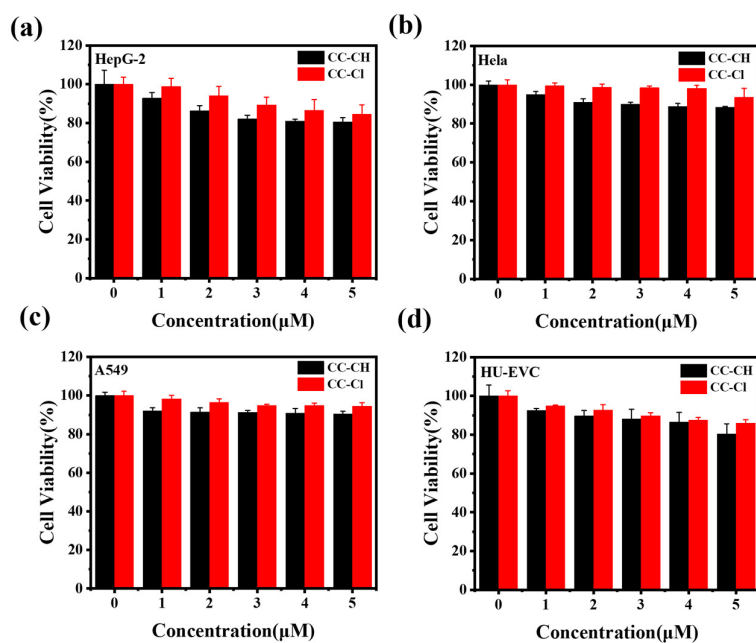

**Figure S2.** Cytotoxicity of CC-CH and CC-Cl in (a) HepG-2, (b) Hela, (c) A549, and (d) HU-EVC cells.

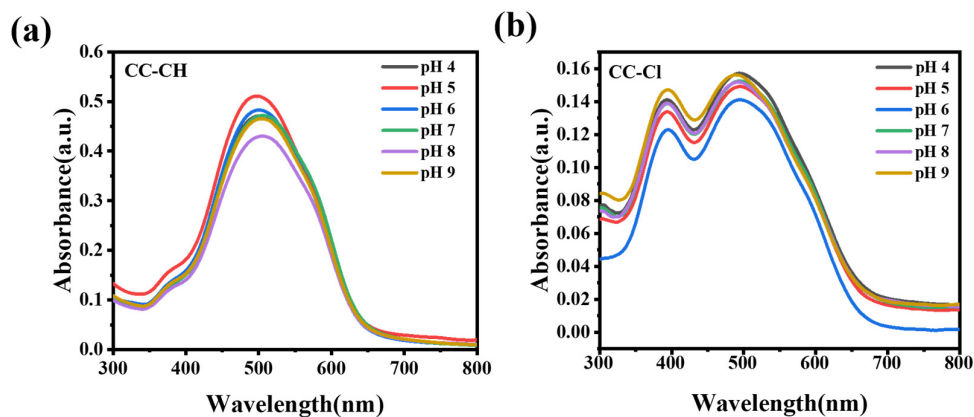

**Figure S3.** The absorption spectra of (a) CC-CH and (b) CC-Cl in PBS with different pH values (pH 4-9).

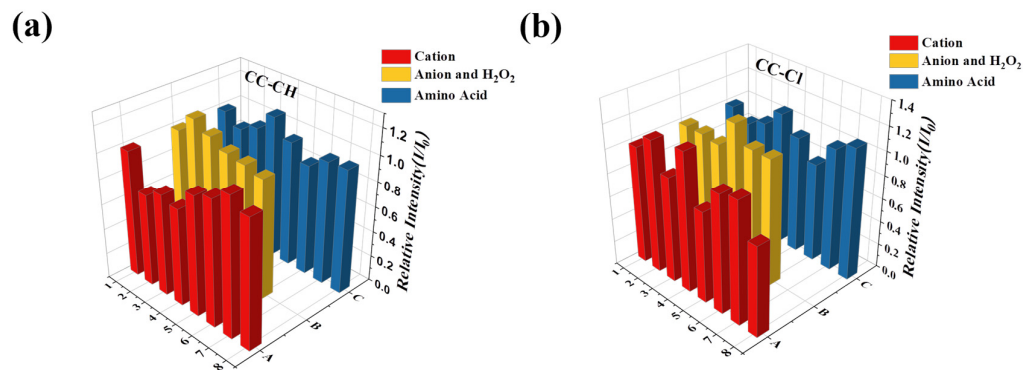

**Figure S4.** The relative fluorescence intensity ( $I/I_0$ ) of (a) CC-CH and (b) CC-Cl to various interfering substances (100  $\mu$ M) in PBS (pH =7.4).

A1/B1/C1, blank; A2,  $\text{Fe}^{3+}$ ; A3,  $\text{Mg}^{2+}$ ; A4,  $\text{Ca}^{2+}$ ; A5,  $\text{Cu}^{2+}$ ; A6,  $\text{Mn}^{2+}$ ; A7,  $\text{K}^+$ ; A8,  $\text{Na}^+$ ; B2,  $\text{SO}_4^{2-}$ ; B3,  $\text{CO}_3^{2-}$ ; B4,  $\text{HCO}_3^-$ ; B5,  $\text{ClO}^-$ ; B6,  $\text{H}_2\text{O}_2$ ; C2, Val; C3, Leu; C4, Pro; C5, Ser; C6, GSH; C7, Cys; C8, Hcy.

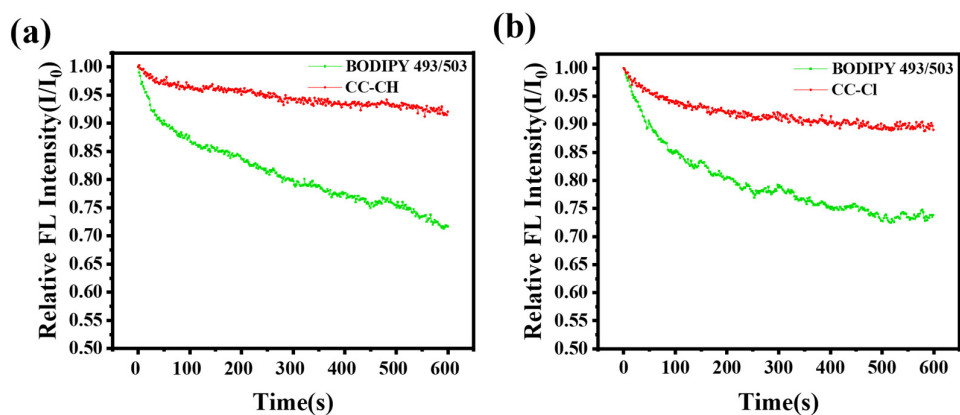

**Figure S5.** The relative fluorescence intensity ( $I/I_0$ ) in HepG-2 cells stained with (a) CC-CH (2.5  $\mu$ M) or (b) CC-Cl (2.5  $\mu$ M) and BODIPY 493/503 (0.2  $\mu$ M) upon continuous scanning by 488 nm laser (300 scans in ten minutes at two-second intervals).

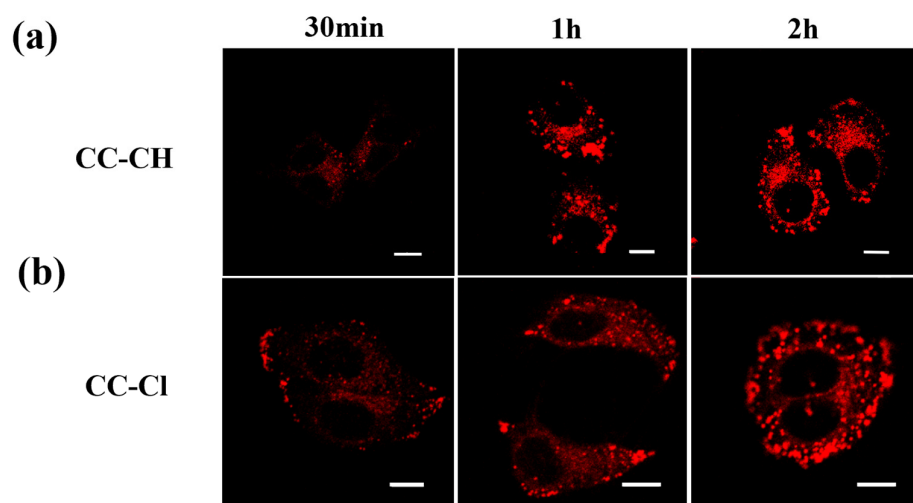

**Figure S6.** Confocal fluorescence images of (a) CC-CH (2.5  $\mu\text{M}$ ) and (b) CC-Cl (2.5  $\mu\text{M}$ ) in HepG-2 cells at different incubation times. Scale bar: 10  $\mu\text{m}$ . Red channel:  $\lambda_{\text{ex}} = 488 \text{ nm}$ ,  $\lambda_{\text{em}} = 568\text{-}643 \text{ nm}$ .

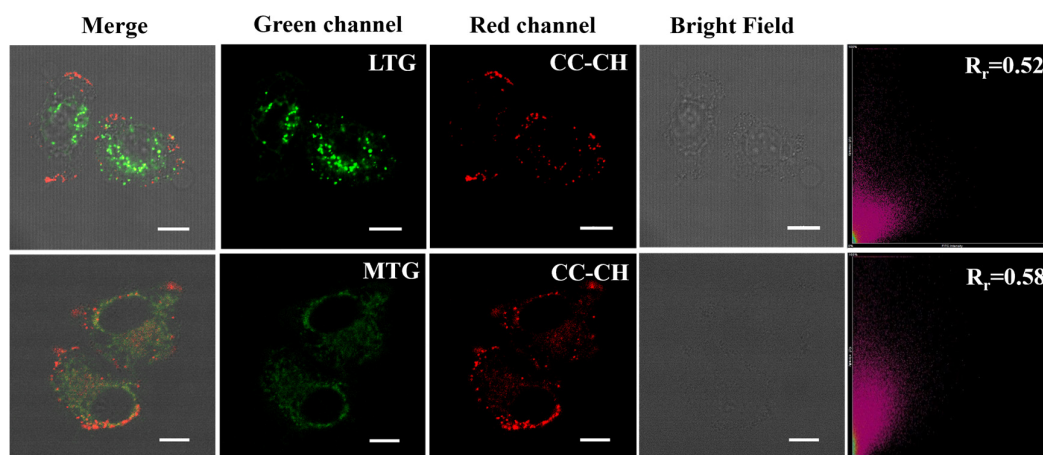

**Figure S7.** Colocalization images of CC-CH (2.5  $\mu\text{M}$ ) with LTG (0.2  $\mu\text{M}$ ) and MTG (0.2  $\mu\text{M}$ ) in HepG-2 cells. Scale bar: 10  $\mu\text{m}$ . Green channel:  $\lambda_{\text{ex}} = 488 \text{ nm}$ ,  $\lambda_{\text{em}} = 500\text{-}530 \text{ nm}$ . Red channel:  $\lambda_{\text{ex}} = 488 \text{ nm}$ ,  $\lambda_{\text{em}} = 568\text{-}643 \text{ nm}$ .

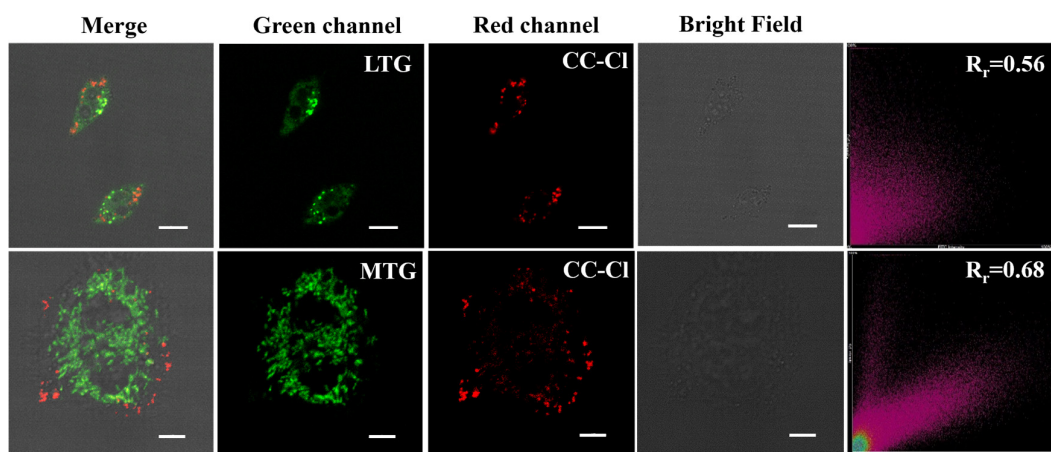

**Figure S8.** Colocalization images of CC-Cl (2.5  $\mu$ M) with LTG (0.2  $\mu$ M) and MTG (0.2  $\mu$ M) in HepG-2 cells. Scale bar: 10  $\mu$ m. Green channel:  $\lambda_{ex}$ = 488 nm,  $\lambda_{em}$ = 500-530 nm. Red channel:  $\lambda_{ex}$ = 488 nm,  $\lambda_{em}$  = 568-643 nm.

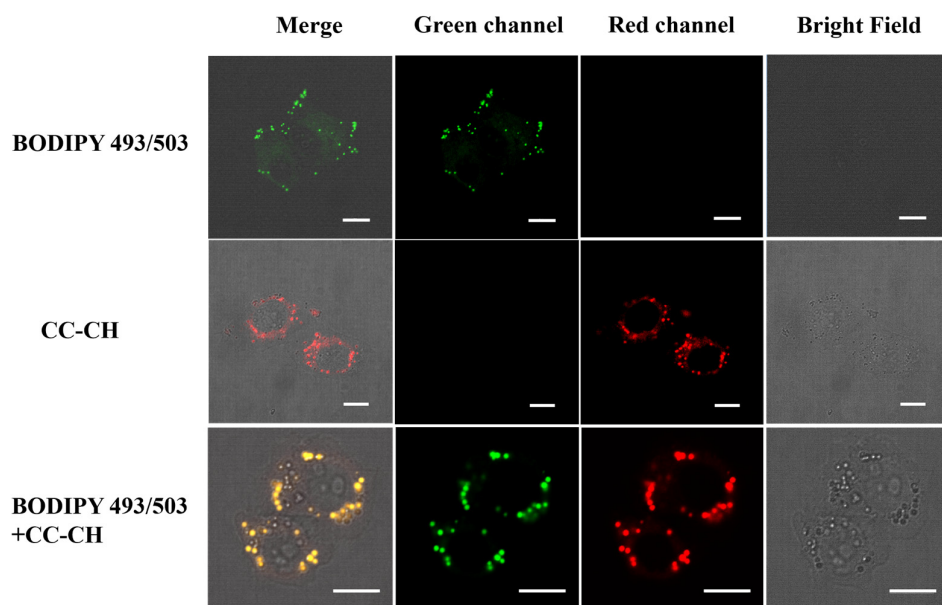

**Figure S9.** Confocal fluorescence images of BODIPY 493/503 (0.2  $\mu$ M), CC-CH (2.5  $\mu$ M), and BODIPY 493/503(0.2  $\mu$ M) with CC-CH (2.5  $\mu$ M) in HepG-2 cells. Scale bar: 10  $\mu$ m. Green channel:  $\lambda_{ex}$ = 488 nm,  $\lambda_{em}$ = 500-530 nm. Red channel:  $\lambda_{ex}$ = 488 nm,  $\lambda_{em}$  = 568-643 nm.

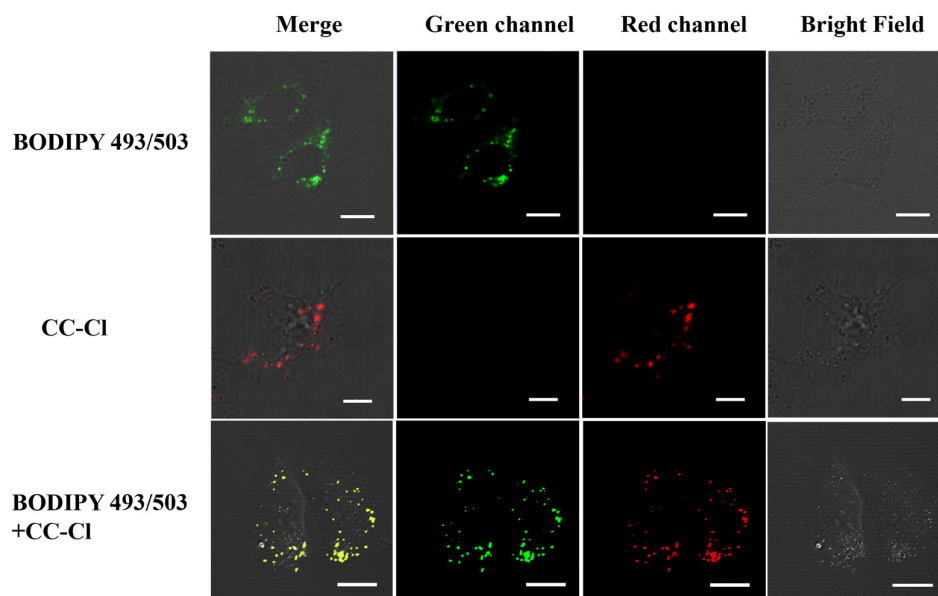

**Figure S10.** Confocal fluorescence images of BODIPY 493/503(0.2  $\mu$ M), CC-Cl (2.5  $\mu$ M), and BODIPY 493/503(0.2  $\mu$ M) with CC-Cl (2.5  $\mu$ M) in HepG-2 cells. Scale bar: 10  $\mu$ m. Green channel:  $\lambda_{\text{ex}}$  = 488 nm,  $\lambda_{\text{em}}$  = 500-530 nm. Red channel:  $\lambda_{\text{ex}}$  = 488 nm,  $\lambda_{\text{em}}$  = 568-643 nm.

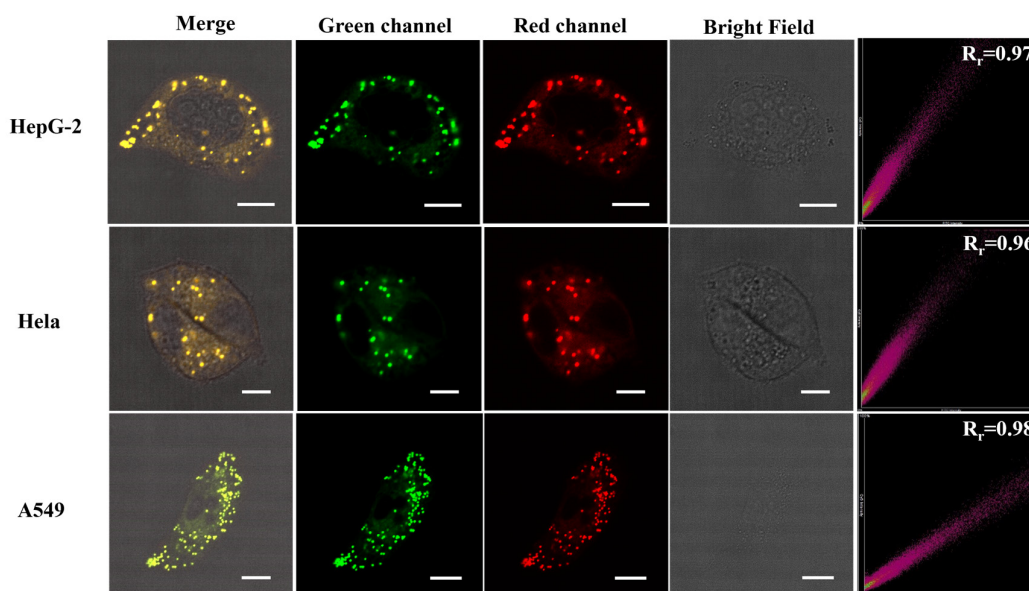

**Figure S11.** Colocalization images of CC-CH (2.5  $\mu$ M) with BODIPY 493/503 in HepG-2, Hela, and A549 cells. Scale bar: 10  $\mu$ m. Green channel:  $\lambda_{\text{ex}}$  = 488 nm,  $\lambda_{\text{em}}$  = 500-530 nm. Red channel:  $\lambda_{\text{ex}}$  = 488 nm,  $\lambda_{\text{em}}$  = 568-643 nm.



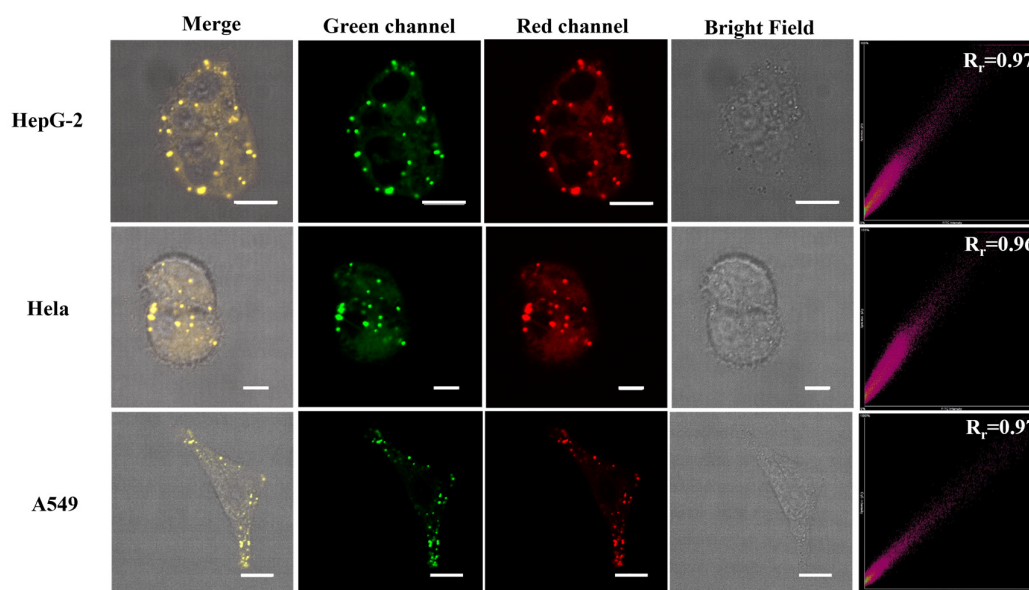

**Figure S12.** Colocalization images of CC-Cl (2.5  $\mu$ M) with BODIPY 493/503 in HepG-2, Hela, and A549 cells. Scale bar: 10  $\mu$ m. Green channel:  $\lambda_{\text{ex}}$  = 488 nm,  $\lambda_{\text{em}}$  = 500-530 nm. Red channel:  $\lambda_{\text{ex}}$  = 488 nm,  $\lambda_{\text{em}}$  = 568-643 nm.

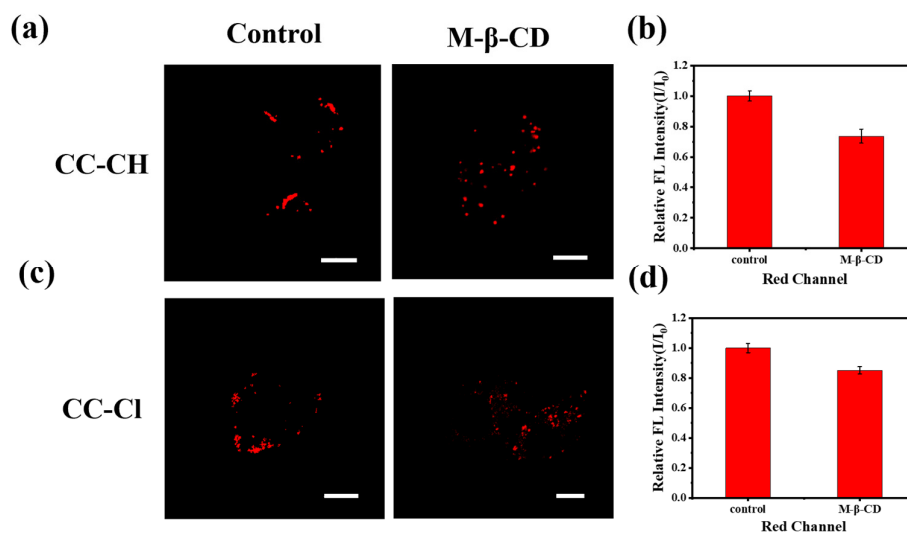

**Figure S13.** Confocal fluorescence images of HepG-2 cells treated with 2 mg/mL M-β-CD for 2h and then stained with (a) CC-CH (2.5 $\mu$ M) and (c) CC-Cl (2.5  $\mu$ M) for 1h. The relative fluorescence intensity( $I/I_0$ ) of (b) CC-CH and



ethanol to obtain khaki solid 1 (3.96g, 82%).  $^1\text{H}$  NMR (400 MHz,  $\text{DMSO}-d_6$ )  $\delta$  7.82 (d,  $J$  = 9.3 Hz, 1H), 7.42 (d,  $J$  = 8.8 Hz, 1H), 6.68 (d,  $J$  = 8.9 Hz, 1H), 6.51 (s, 1H), 5.99 (d,  $J$  = 9.3 Hz, 1H), 3.42 (q,  $J$  = 7.1 Hz, 4H), 1.12 (t,  $J$  = 7.1 Hz, 6H).

**Synthesis of compound 7-(diethylamino)-2-oxo-2H-chromene-3-carbaldehyde (2):**

Under a nitrogen atmosphere, 5 mL phosphorus oxychloride ( $\text{POCl}_3$ ) was added to a two-necked flask, and then 7.2 mL anhydrous N, N-Dimethylformamide (DMF) was added dropwise to  $\text{POCl}_3$ . The temperature was raised to 50 °C and stirred for 0.5 h to produce a gold colored reactive intermediate. A solution of compound 1 (3.9g, 18mmol) in anhydrous DMF (20.0 mL) was added to reaction mixture and reacted at 60 °C for 12 h. The reaction solution was cooled to room temperature and added into ice water (150 mL). Aqueous NaOH solution was used to adjust to neutral pH, which was filtered with suction and washed the solid three times with ultrapure water and ethanol. Ethanol was used to obtain orange needle-like crystalline solid 2 (2.7 g, 69%).  $^1\text{H}$  NMR (400 MHz,  $\text{CDCl}_3-d$ )  $\delta$  10.13 (s, 1H), 8.25 (s, 1H), 7.41 (d,  $J$  = 9.0 Hz, 1H), 6.64 (d,  $J$  = 9.0 Hz, 1H), 6.49 (s, 1H), 3.48 (q,  $J$  = 7.2 Hz, 4H), 1.25 (t,  $J$  = 7.1 Hz, 6H).

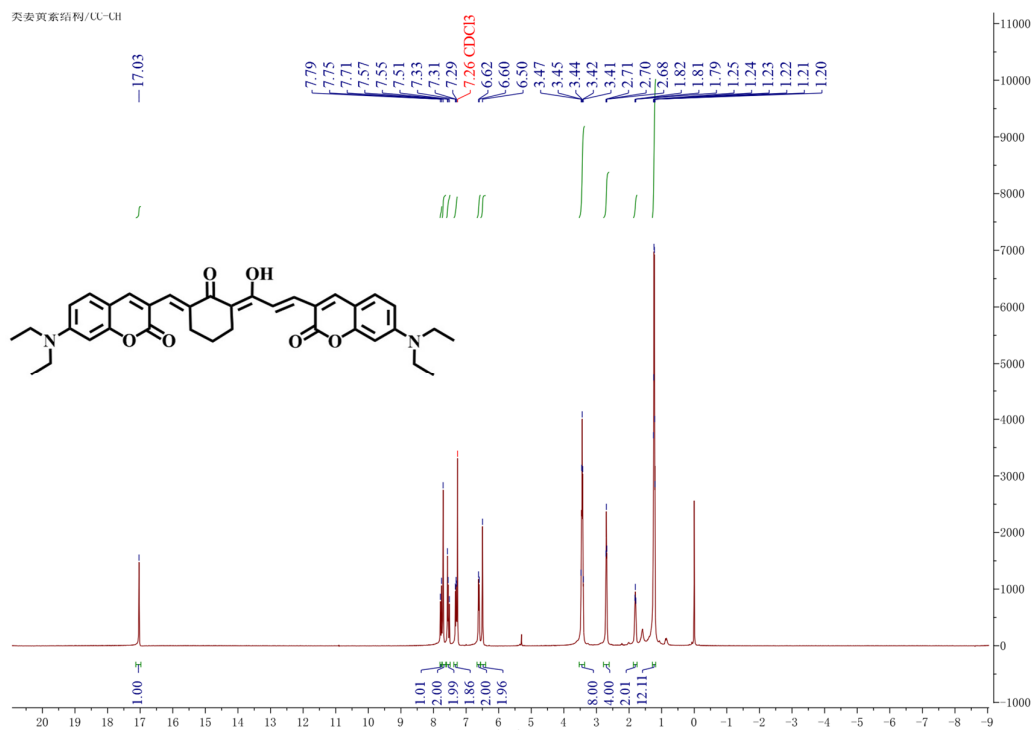

Figure S14. <sup>1</sup>H NMR of CC-CH.

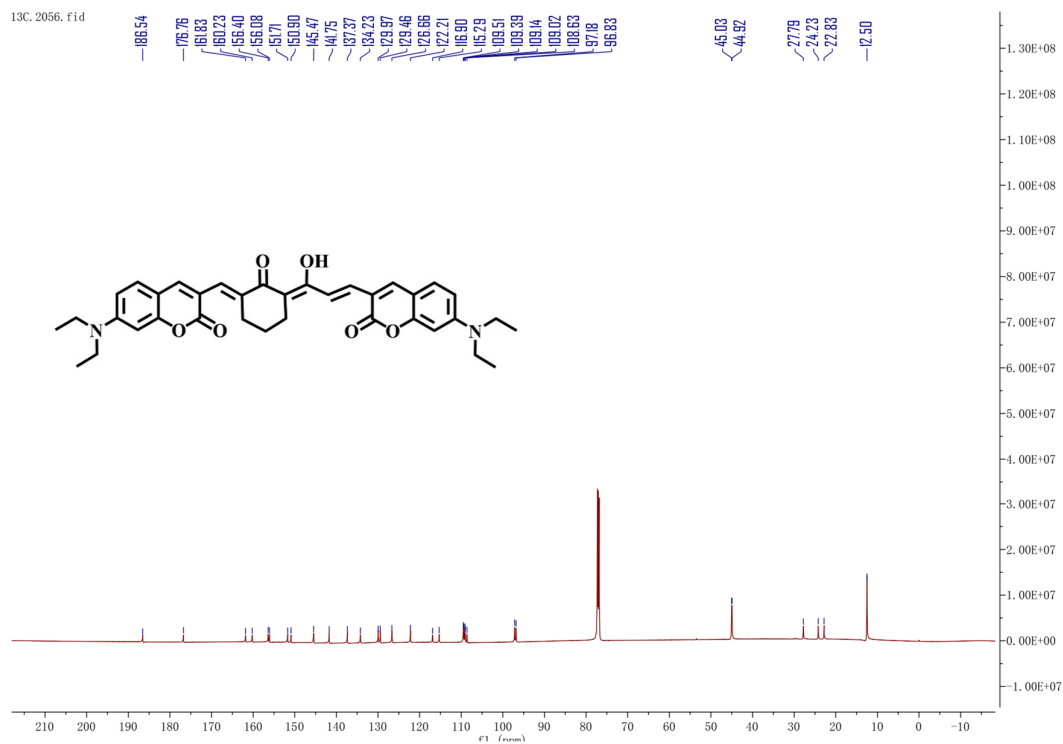

Figure S15. <sup>13</sup>C NMR of CC-CH.

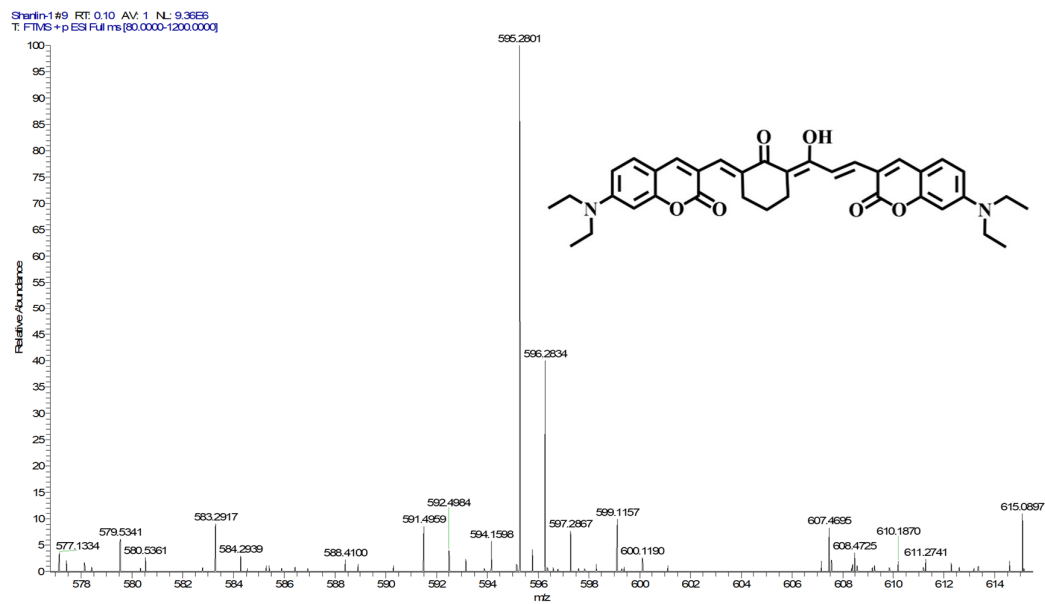

Figure S16. ESI-MS spectra of CC-CH.

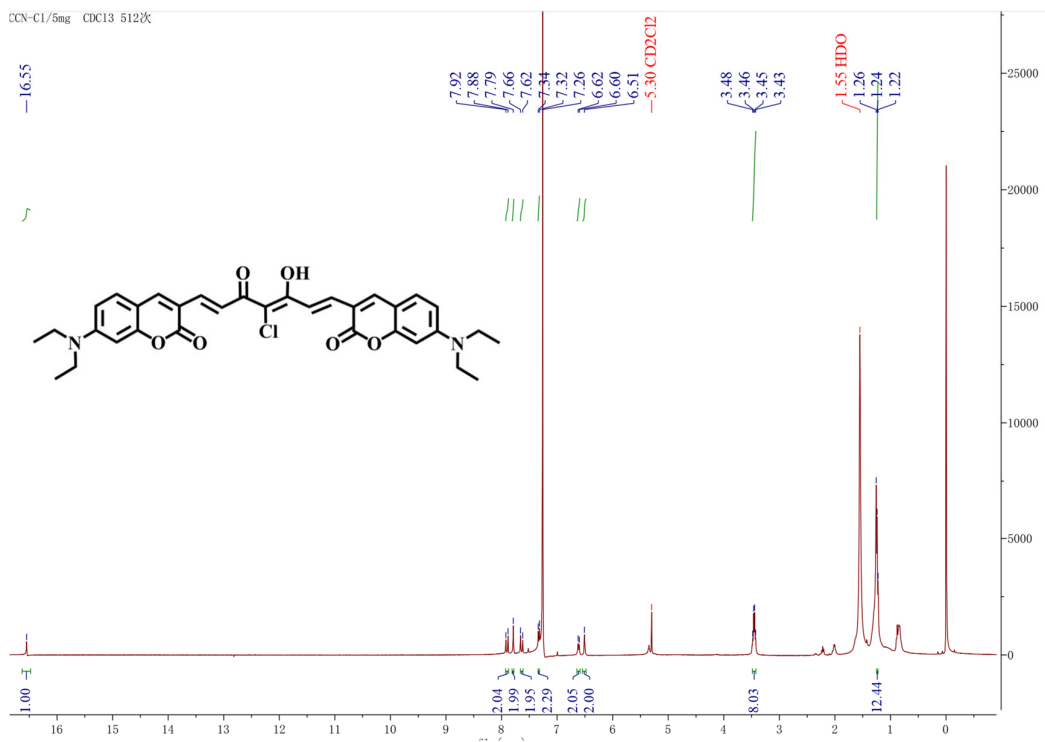

Figure S17. <sup>1</sup>H NMR of CC-Cl.

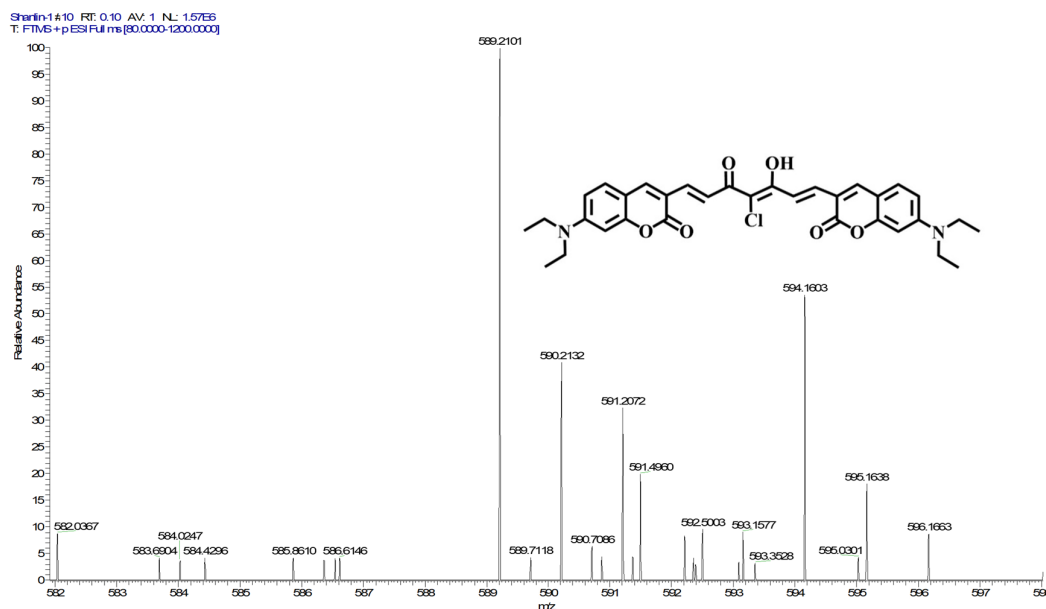

**Figure S18.** ESI-MS spectra of CC-Cl.

## References

1. Reichardt, C. Solvatochromic Dyes as Solvent Polarity Indicators. *Chem. Rev.* **1994**, *94*, 2319-2358.
2. Zhang, Y.; Teng, H.; Gao, Y.; Afzal, M.W.; Tian, J.; Chen, X.; Tang, H.; James, T.D.; Guo, Y. A general strategy for selective detection of hypochlorous acid based on triazolopyridine formation. *Chin. Chem. Lett.* **2020**, *31*, 2917-2920, doi:10.1016/j.cclet.2020.03.020.
